# Supplementary material for: Genetic surveillance of Plasmodium falciparum populations following treatment policy revisions in the Greater Mekong Subregion
Source: bioRxiv or medRxiv preprint supplement (doi:10.1101/2024.06.06.24308535), 2025-03-24
Supplement: Supplementary file [file media-1.pdf]

# Supplementary material

|                                                                                                                                                                                                           |           |
|-----------------------------------------------------------------------------------------------------------------------------------------------------------------------------------------------------------|-----------|
| <b>SUPPLEMENTARY TABLES .....</b>                                                                                                                                                                         | <b>2</b>  |
| SUPPLEMENTARY TABLE 1. GENOTYPICALLY CONFIRMED <i>P. FALCIPARUM</i> SAMPLES BY YEAR AND PROVINCE.ERROR! BOOKMARK NOT DEFINED.                                                                             |           |
| SUPPLEMENTARY TABLE 2. INCLUDED GENETIC MARKERS WITH ASSOCIATED ANTIMALARIAL .....                                                                                                                        | 2         |
| SUPPLEMENTARY TABLE 3. DISTRIBUTION OF <i>KELCH13</i> ALLELE VARIANTS BETWEEN 2017 AND 2022. ....                                                                                                         | 4         |
| SUPPLEMENTARY TABLE 4. CHANGES IN PIPERAQUINE (PPQ)-R OF THREE LARGEST KEL1/PLA1 CLUSTERS (KLV-01, KLV-02 AND KLV-03). ....                                                                               | 5         |
| <b>SUPPLEMENTARY FIGURES .....</b>                                                                                                                                                                        | <b>6</b>  |
| SUPPLEMENTARY FIGURE 1. COLLECTED AND GENOTYPED <i>P. FALCIPARUM</i> (Pf) SAMPLES.....                                                                                                                    | 6         |
| SUPPLEMENTARY FIGURE 2. PROPORTION OF REGISTERED <i>P. FALCIPARUM</i> (Pf) INFECTIONS BY THE WORLD HEALTH ORGANIZATION (WHO) COMPARED TO THE NUMBER OF COLLECTED SAMPLES BY THE GENRE-MEKONG PROJECT..... | 7         |
| SUPPLEMENTARY FIGURE 3. PREDICTED REGIONAL ANTIMALARIAL RESISTANCE FROM 2017 TO 2022.....                                                                                                                 | 8         |
| SUPPLEMENTARY FIGURE 4. PREDICTED RESISTANCE TO MEFLOROQUINE PER PROVINCE DIVIDED IN THREE PERIODS.....                                                                                                   | 9         |
| SUPPLEMENTARY FIGURE 5. PREDICTED RESISTANCE TO CHLOROQUINE PER PROVINCE DIVIDED IN THREE PERIODS.....                                                                                                    | 9         |
| SUPPLEMENTARY FIGURE 6. PREVALENCE OF KEL1/PLA1 BETWEEN 2017 AND 2022. ....                                                                                                                               | 10        |
| SUPPLEMENTARY FIGURE 7. VISUALISATION OF NON-GMS SAMPLES USING THE PUBLIC Pf7 DATA RELEASE OF MALARIAGEN. ....                                                                                            | 10        |
| <b>REFERENCES.....</b>                                                                                                                                                                                    | <b>11</b> |

## Supplementary Tables

Supplementary Table 1. Included genetic markers with antimalarial resistance prediction.

| <i>P. falciparum</i> gene                                                                                                                                                                                                                          | Resistance classification                               |
|----------------------------------------------------------------------------------------------------------------------------------------------------------------------------------------------------------------------------------------------------|---------------------------------------------------------|
| <b><i>kelch13</i><sup>a</sup></b><br>441L, 446I, 449A, 452E, 458Y, 469Y, 469F, 476I, 479I, 481V, 493H, 515K, 522C, 527L, 537I, 537D, 538V, 539T, 543T, 553L, 561H, 568G, 574L, 575K, 579I, 580Y, 584V, 667T, 673I, 675V or 719N as homozygous call | artemisinin                                             |
| <b><i>plasmepsin2/3 (pm23)</i> amplification<sup>b</sup></b><br><b><i>WHO kelch13 mutant and multiple copies of pm23</i></b>                                                                                                                       | piperaquine<br>dihydroartemisinin-piperaquine (DHA-PPQ) |
| <b><i>crt</i></b><br>76T                                                                                                                                                                                                                           | chloroquine                                             |
| <b><i>dhfr</i></b><br>108N<br>51I and 59R and 108N, all homozygous                                                                                                                                                                                 | pyrimethamine<br>sulfadoxine-pyrimethamine              |
| <b><i>dhps</i></b><br>437G                                                                                                                                                                                                                         | sulfadoxine                                             |
| <b><i>dhfr &amp; dhps</i></b><br><i>dhfr</i> : 51I + 59R + 108N + <i>dhps</i> : 437G + 540E<br>+ one of <i>dhfr</i> :164L, <i>dhps</i> :581G, <i>dhps</i> :613S or <i>dhps</i> :613T<br>with all mutants homozygous                                | sulfadoxine-pyrimethamine (IPTp <sup>c</sup> )          |
| <b><i>mdr1</i> amplification<sup>b</sup></b><br><b><i>WHO kelch13 mutant and multiple copies of mdr1</i></b>                                                                                                                                       | mefloquine<br>artesunate-mefloquine                     |

Comprehensive details of genetic markers used in SPOTMalaria:

<https://ngs.sanger.ac.uk/production/malaria/Resource/29/20200705-GenRe-04a-SpotMalaria-0.39.pdf>, pages 4-7, and phenotype prediction rules used in the GenRe-Mekong project:

<https://ngs.sanger.ac.uk/production/malaria/Resource/29/20200705-GenRe-05-PhenotypeRules-0.39.pdf>

<sup>a</sup> The list of validated mutations in the BTB/POZ and the propeller domain was based on the WHO list:

<https://iris.who.int/handle/10665/274362>

<sup>b</sup> Confirmatory *plasmepsin2/3* and *mdr1* amplification testing was performed using qPCR.

<sup>c</sup> Intermittent preventive treatment in pregnancy

**Supplementary Table 2. Genotypically confirmed *P. falciparum* samples by year and province.**

In 2017, a pilot study (1207-PF-KH-CNM-GENRE) was conducted with the National Center for Parasitology, Entomology and Malaria Control (CNM) during which 48 samples were collected and genotyped. Subsequently, from July 2020 onwards routine genetic surveillance was conducted.

\*From January up to June 2022.

| Country  | Province     | 2017 | 2018 | 2019 | 2020 | 2021 | 2022* |
|----------|--------------|------|------|------|------|------|-------|
| Cambodia | Kampong Speu |      |      |      | 20   | 38   | 6     |
|          | Mondulhiri   |      |      |      | 4    | 7    | 2     |
|          | Pursat       |      |      |      | 6    | 19   | 31    |
|          | Ratanakiri   | 26   |      |      |      |      |       |
|          | Stung Treng  | 23   |      |      |      |      |       |
| Laos     | Attapeu      | 101  | 208  | 48   | 210  | 122  | 34    |
|          | Champasak    | 94   | 147  | 28   | 2    | 11   |       |
|          | Salavan      | 103  | 99   | 27   | 15   |      | 2     |
|          | Savannakhet  | 284  | 387  | 212  | 70   | 116  | 4     |
|          | Sekong       | 13   | 9    | 12   | 9    | 4    |       |
| Vietnam  | Binh Phuoc   | 51   | 324  | 24   | 3    | 4    |       |
|          | Binh Thuan   |      |      |      | 7    | 1    |       |
|          | Dak Lak      | 167  | 125  | 298  | 46   |      |       |
|          | Dak Nong     | 60   | 70   | 48   | 7    |      |       |
|          | Gia Lai      | 272  | 446  | 523  | 151  | 73   | 16    |
|          | Khanh Hoa    | 26   | 48   | 7    | 1    |      |       |
|          | Kon Tum      |      |      | 3    |      |      |       |
|          | Ninh Thuan   | 43   | 12   | 13   | 1    |      |       |
|          | Phu Yen      |      |      | 197  | 55   | 17   | 4     |
|          | Quang Binh   |      |      |      |      |      | 1     |
|          | Quang Tri    | 28   | 19   | 7    | 1    | 1    | 1     |

**Supplementary Table 3. Distribution of *kelch13* allele variants between 2017 and 2022.**

Proportion of samples with *kelch13* variant in each country in each year are shown as percentages. All detected variants were listed. WT-wild type indicates no mutation in *kelch13*. Heterozygous includes parasites that carried more than one *kelch13* mutations. Missing indicates the proportion of parasites with missing *kelch13* genotype. Classification resistant status was determined from the validated allele associated with delayed clearance as published by WHO [4]. Full details about methods of classification is given in the SpotMalaria Technical Notes at <https://www.malariagen.net/resource/29>.

| Country  | Classification | <i>kelch13</i> allele | 2017  | 2018  | 2019  | 2020  | 2021  | 2022  |
|----------|----------------|-----------------------|-------|-------|-------|-------|-------|-------|
| Cambodia | Sensitive      | WT                    | 10.2% |       |       | 10.0% | 1.6%  | 2.6%  |
|          |                | C580Y                 | 83.7% |       |       | 30.0% | 54.7% | 12.8% |
|          | Resistant      | P553L                 | 4.1%  |       |       |       |       |       |
|          |                | Y493H                 |       |       |       | 36.7% | 29.7% | 46.2% |
|          | Undetermined   | missing               | 2.0%  |       |       | 23.3% | 4.7%  | 10.3% |
|          |                | heterozygous          |       |       |       |       | 9.4%  | 28.2% |
| Laos     | Sensitive      | WT                    | 43.2% | 64.4% | 30.0% | 24.2% | 42.7% | 15.0% |
|          |                | C580Y                 | 12.9% | 22.5% | 15.6% | 12.7% | 17.4% | 60.0% |
|          | Resistant      | P574L                 | 0.8%  |       |       |       |       |       |
|          |                | R539T                 | 0.2%  | 1.2%  | 3.4%  | 45.4% | 27.3% | 10.0% |
|          |                | Y493H                 | 1.5%  | 0.1%  |       | 0.3%  |       |       |
|          | Undetermined   | G357S                 |       |       |       |       | 0.4%  |       |
|          |                | G544R                 |       |       |       |       | 0.4%  |       |
|          |                | missing               | 40.5% | 10.0% | 44.6% | 16.0% | 7.9%  | 15.0% |
|          |                | heterozygous          | 0.8%  | 1.9%  | 6.4%  | 1.3%  | 4.0%  |       |
| Vietnam  | Sensitive      | WT                    | 20.2% | 11.8% | 5.0%  | 0.7%  | 2.1%  | 4.5%  |
|          |                | C469F                 | 0.5%  | 0.1%  |       |       |       |       |
|          | Resistant      | C580Y                 | 54.4% | 77.3% | 86.0% | 89.3% | 95.8% | 63.6% |
|          |                | P553L                 | 1.5%  | 0.3%  |       |       |       |       |
|          |                | R539T                 | 0.2%  |       |       |       |       |       |
|          | Undetermined   | missing               | 20.6% | 8.6%  | 8.0%  | 9.6%  | 2.1%  | 31.8% |
|          |                | heterozygous          | 2.6%  | 1.9%  | 1.0%  | 0.4%  |       |       |

**Supplementary Table 4. Changes in piperaquine (PPQ)-R of three largest KEL1/PLA1 clusters (KLV-01, KLV-02 and KLV-03).** Proportion of samples predicted resistant to PPQ are shown. Data is aggregated by quarter Q1: January – March; Q2: April – June; Q3: July – September; Q4: October – December. NA means there are no samples from the cluster, whilst 0% means none of the samples were predicted resistant to PPQ.

|      |    | PPQ-R  |        |        |
|------|----|--------|--------|--------|
|      |    | KLV-01 | KLV-02 | KLV-03 |
| 2017 | Q1 | 100%   | NA     | NA     |
|      | Q2 | 100%   | NA     | NA     |
|      | Q3 | 86%    | 100%   | NA     |
|      | Q4 | 88%    | 100%   | NA     |
| 2018 | Q1 | 94%    | 100%   | NA     |
|      | Q2 | 94%    | 100%   | NA     |
|      | Q3 | 100%   | 98%    | 100%   |
|      | Q4 | 96%    | 100%   | 100%   |
| 2019 | Q1 | 92%    | 100%   | 100%   |
|      | Q2 | 96%    | 98%    | 90%    |
|      | Q3 | 99%    | 91%    | 91%    |
|      | Q4 | 96%    | 98%    | 87%    |
| 2020 | Q1 | 94%    | 95%    | 93%    |
|      | Q2 | 82%    | 100%   | 85%    |
|      | Q3 | 20%    | 100%   | 67%    |
|      | Q4 | 17%    | NA     | 30%    |
| 2021 | Q1 | 0%     | NA     | 25%    |
|      | Q2 | 0%     | NA     | 8%     |
|      | Q3 | NA     | NA     | 0%     |
|      | Q4 | NA     | NA     | 0%     |
| 2022 | Q1 | NA     | NA     | 0%     |
|      | Q2 | NA     | NA     | 0%     |

## Supplementary Figures

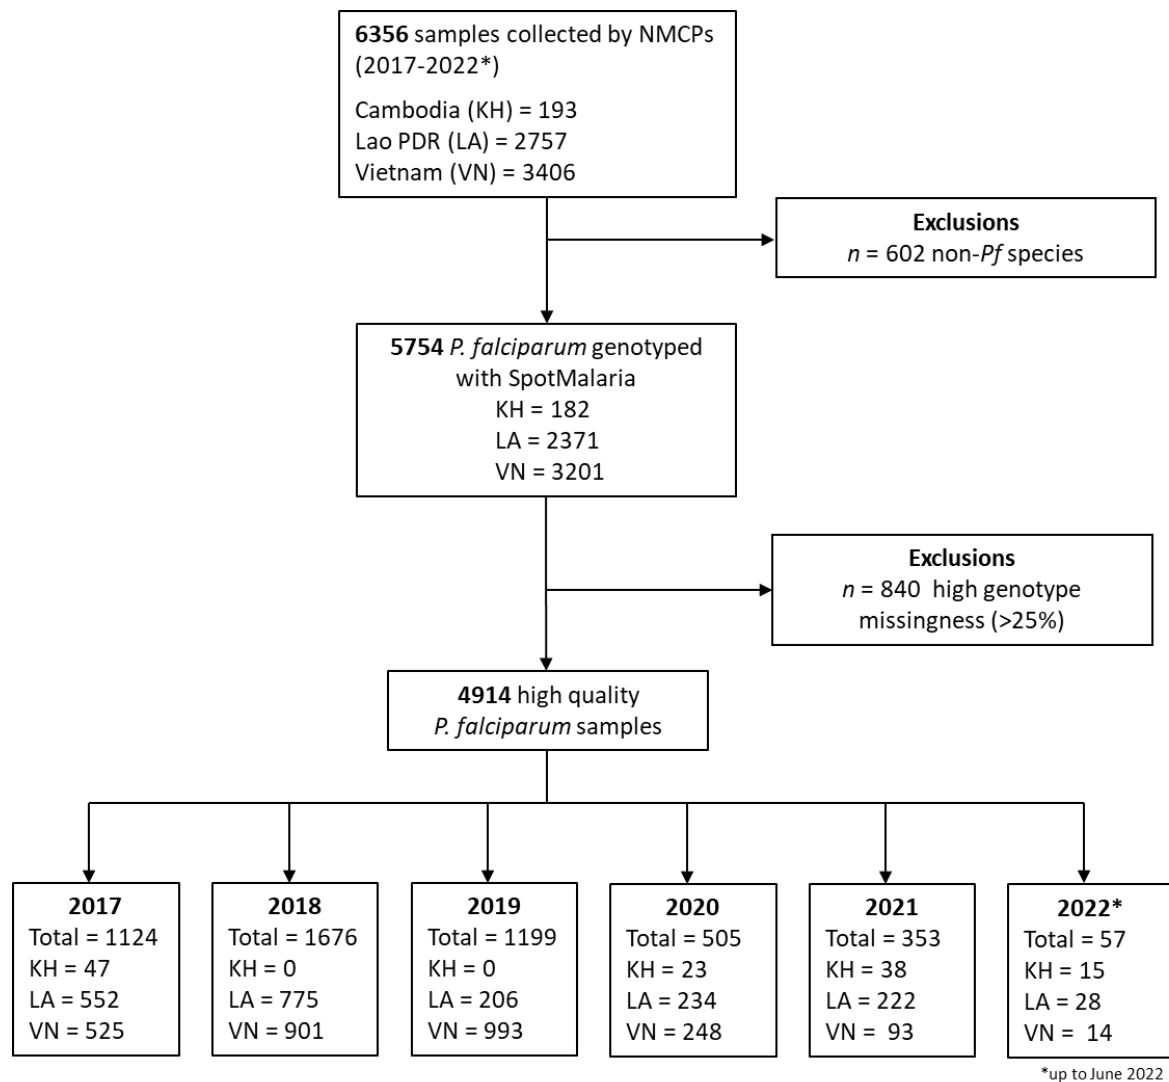

**Supplementary Figure 1. Collected and genotyped *P. falciparum* (*Pf*) samples.** The diagram shows how the analysed sample set was derived from *Pf* samples collected by National Malaria Control Programmes (NMCPs), and the composition of this sample set by country and year.

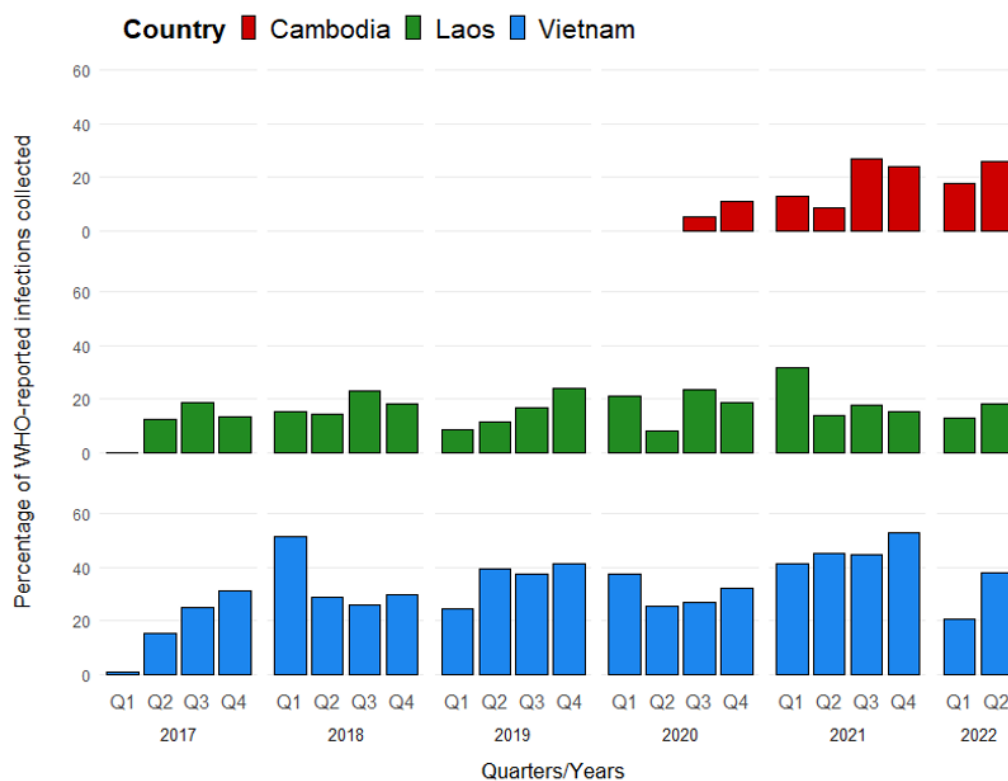

**Supplementary Figure 2. Percentage of WHO-registered *P. falciparum* infections that were sampled by the GenRe-Mekong project.** Between January 2017 to April 2022, 32.6% and 16.1% *Pf* infections in Vietnam and Laos were sampled by the GenRe-Mekong project, respectively. While, for Cambodia, between 2020 and 2022 14.3% of the registered *P. falciparum* infections by the WHO were represented by the GenRe-Mekong project [1-3].

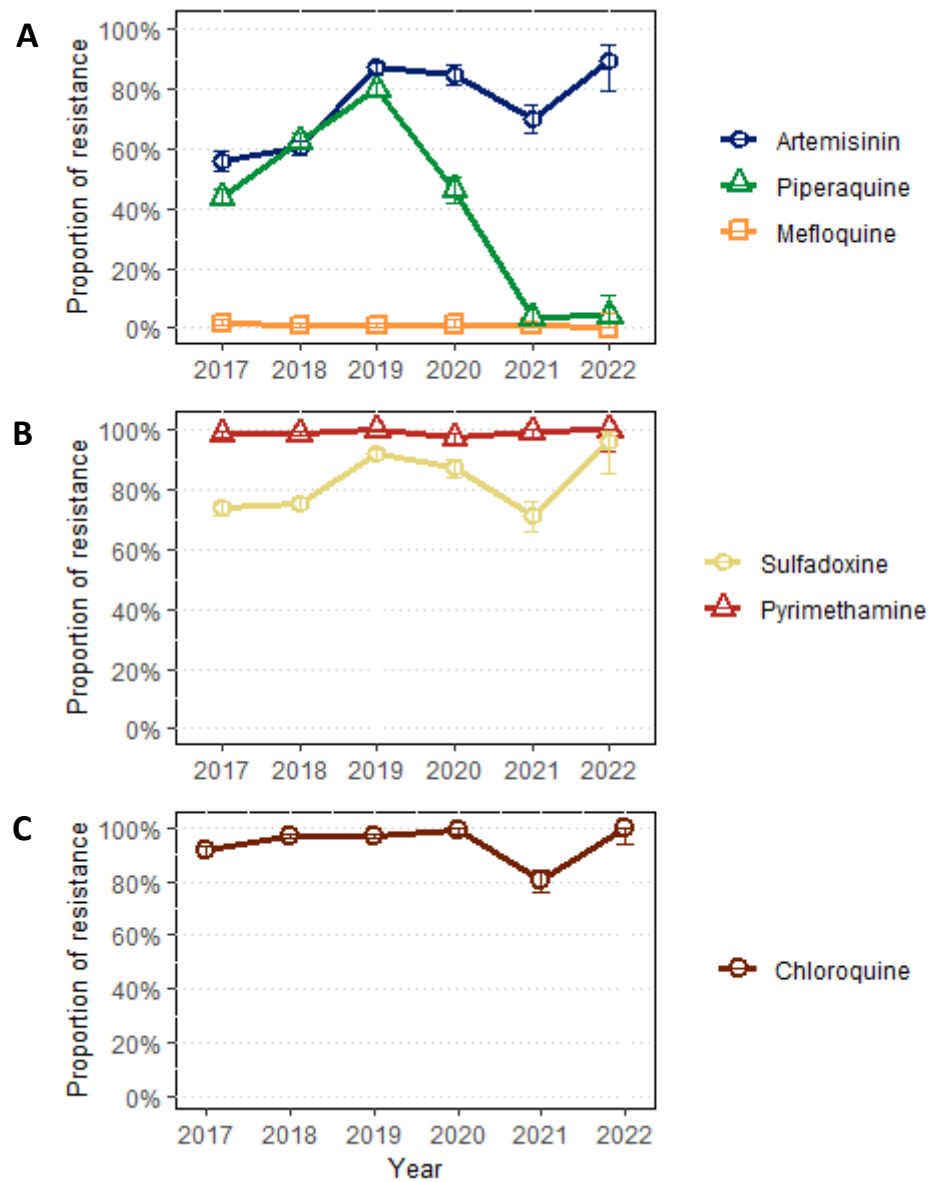

**Supplementary Figure 3. Predicted regional antimalarial resistance from 2017 to 2022 of A) artemisinin, piperaquine and mefloquine, B) sulfadoxine and pyrimethamine, C) chloroquine. Error bars indicate 95% confidence intervals.**



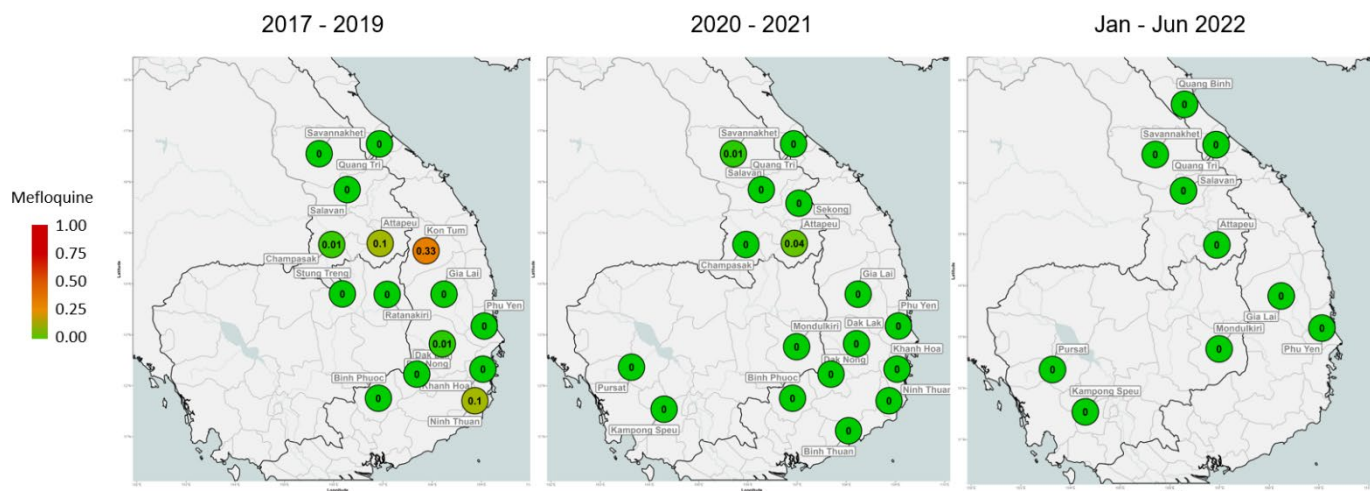

**Supplementary Figure 4. Predicted resistance to mefloquine per province divided in three periods.** Left: 2017-2019, middle: 2020-2021, right: January – June 2022. Colour reflects resistance prevalence ranging from 0 to 1, where 0 means no parasites show resistance and 1 means 100% of the parasites in the province carried the resistance markers thus predicted to be resistant to the drug. A marker appears when there are at least 2 samples from the province.

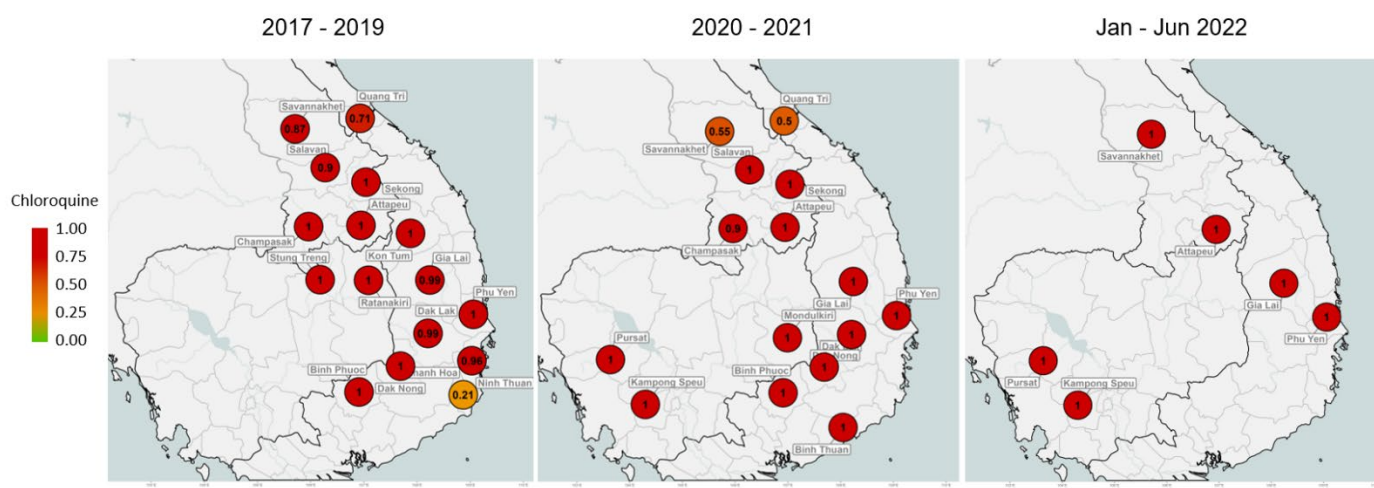

**Supplementary Figure 5. Predicted resistance to chloroquine per province divided in three periods.** Left: 2017-2019, middle: 2020-2021, right: January – June 2022. Colour reflects resistance prevalence ranging from 0 to 1, where 0 means no parasites show resistance and 1 means 100% of the parasites in the province carried the resistance markers thus predicted to be resistant to the drug. A marker appears when there are at least 2 samples from the province.

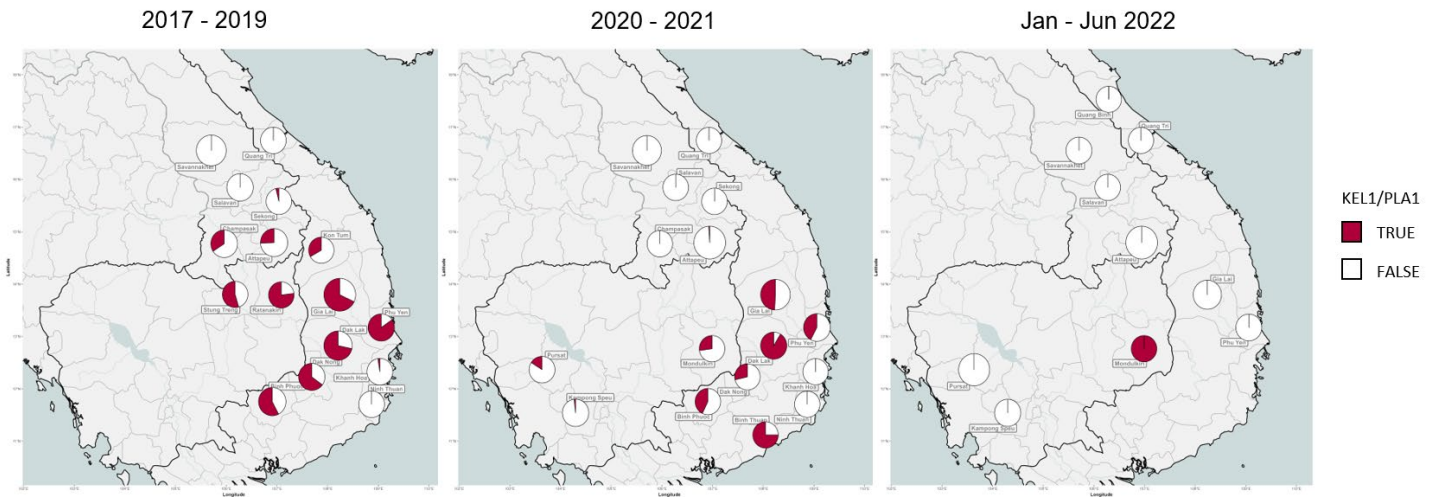

**Supplementary Figure 6. Prevalence of KEL1/PLA1 between 2017 and 2022.** Pie chart showing proportion of samples classified as KEL1/PLA1, having both C580Y *kelch13* mutation and *plasmepsin 2/3* amplification (KEL1/PLA1 = TRUE). Size of pie chart corresponds to the sample number in the province.

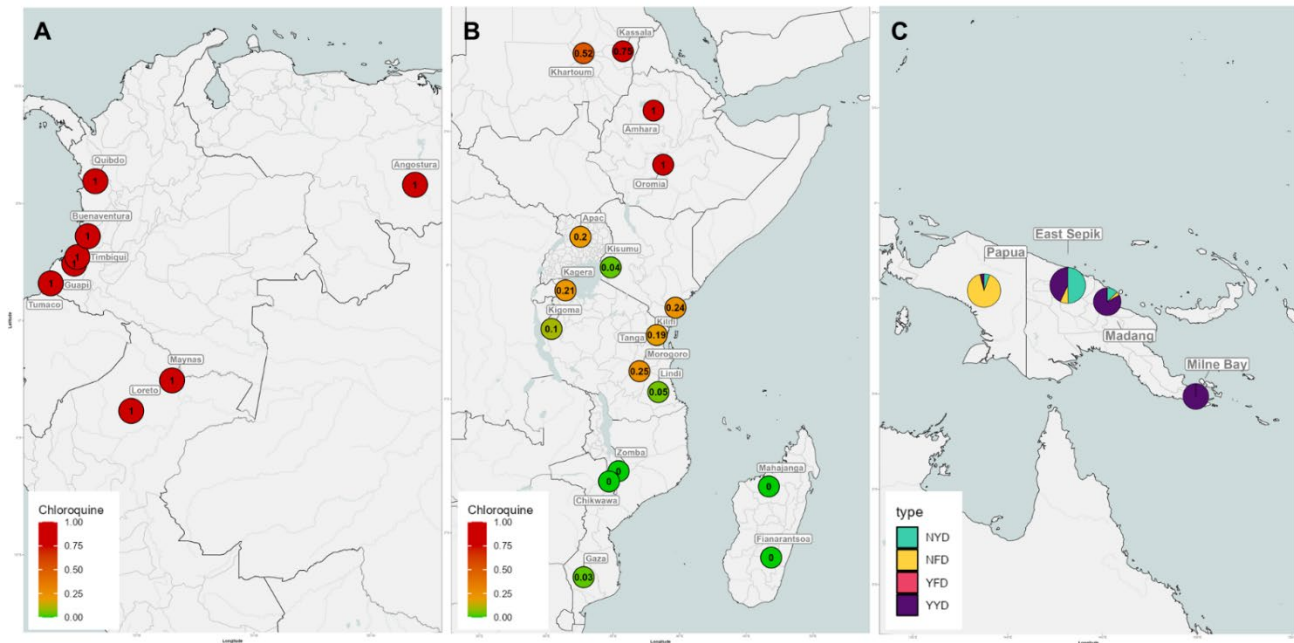

**Supplementary Figure 7. Visualisation of non-GMS samples using the public Pf7 data release of MalariaGEN.** A) shows predicted chloroquine resistance in 177 samples from Colombia, Peru, and Venezuela collected between 2009 and 2017. B) shows predicted chloroquine resistance in 1,386 samples from East-Africa collected between 2010 and 2018. C) shows detected *mdr1* haplotypes (NYD: wild-type) for 386 samples from Indonesia and Papua New Guinea collected between 2008 and 2017.

## References

- 1 WHO. Artemisinin resistance and artemisinin-based combination therapy efficacy: status report. Geneva: World Health Organization, 2018.
2. WHO. Mekong malaria elimination: epidemiology summary, volume 4, October–December 2018. Geneva: World Health Organization, 2018. WHO reference number: WHO/CDS/GMP/MME/2018.05.
3. WHO. Mekong malaria elimination: epidemiology summary, volume 12, October–December 2020. Geneva: World Health Organization, 2020. WHO reference number: WHO/UCN/GMP/MME/2020.06.
4. WHO. Mekong Malaria Elimination: epidemiology summary, volume 16, October–December 2021. Geneva: World Health Organization, 2022. WHO reference number: WHO/UCN/GMP/MME/2022.02.
